# Supplementary material
Source: Royal Society of Chemistry journal article supplement (doi:10.1039/d5cp04735h)
Supplement: d5cp04735h1.pdf [file d5cp04735h1.pdf]

## Supporting Information

### **Chalcogen bond interactions involving sulphur atoms of methionine or cysteine residues and backbone carbonyl oxygen atoms in protein structures**

**Prathvi Singh,<sup>a</sup> Venkatnarayan Ramanathan<sup>b</sup> and Ramasubbu Sankararamakrishnan<sup>\*a,c</sup>**

*<sup>a</sup>Department of Biological Sciences and Bioengineering, Indian Institute of Technology Kanpur, Kanpur 208016, Uttar Pradesh, India*

*<sup>b</sup>Department of Chemistry, Indian Institute of Technology (BHU) Varanas, Varanasi 221005, Uttar Pradesh, India*

*<sup>c</sup>Mehta Family Center for Engineering in Medicine, Indian Institute of Technology Kanpur, Kanpur 208016, Uttar Pradesh, India*

\*Author for Correspondence

Email: [rsankar@iitk.ac.in](mailto:rsankar@iitk.ac.in)

Tel: +91 512 259 4014

Fax: +91 512 259 4010

**Figure S1:**

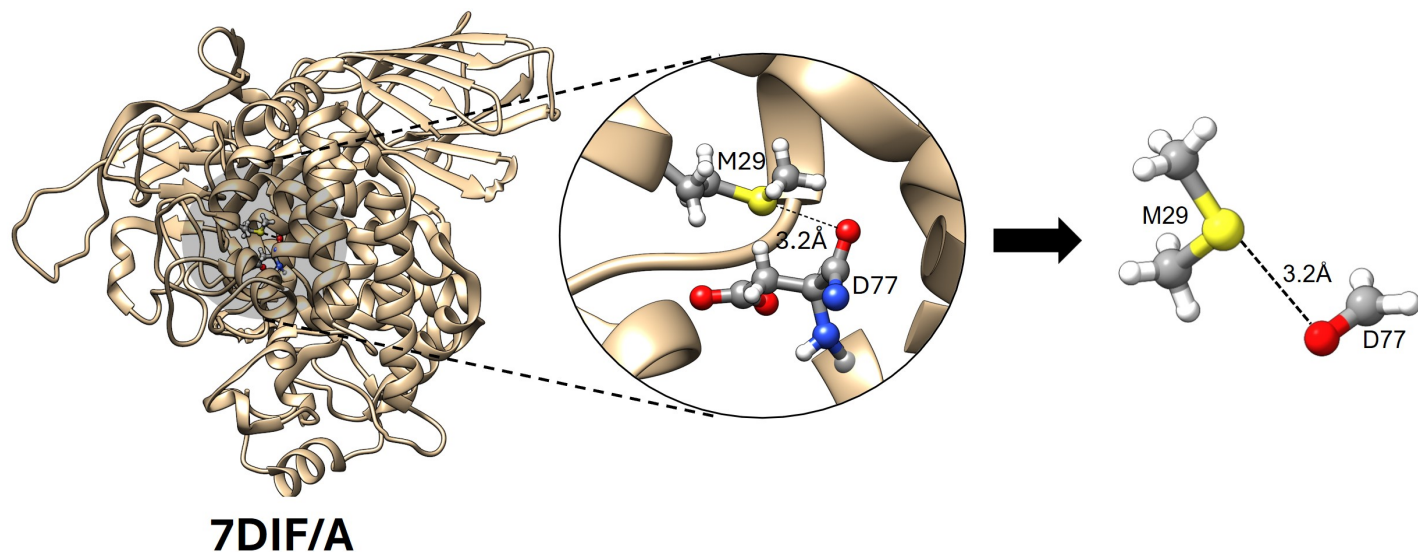

**Fig. S1:** A representative example of chalcogen bond between Met sulphur and backbone carbonyl oxygen atoms found in a hydrolase structure (PDB ID: 7DIF). The residues participating in chalcogen bond interaction are zoomed in with ball-and-stick representation. Standard colours are used to represent the atoms. Distance between the sulphur and carbonyl oxygen atom is shown. The arrow indicates the model compounds generated without altering the conformations of the residues found in the protein structure retaining the geometry of ChB interaction.

**Figure S2:**

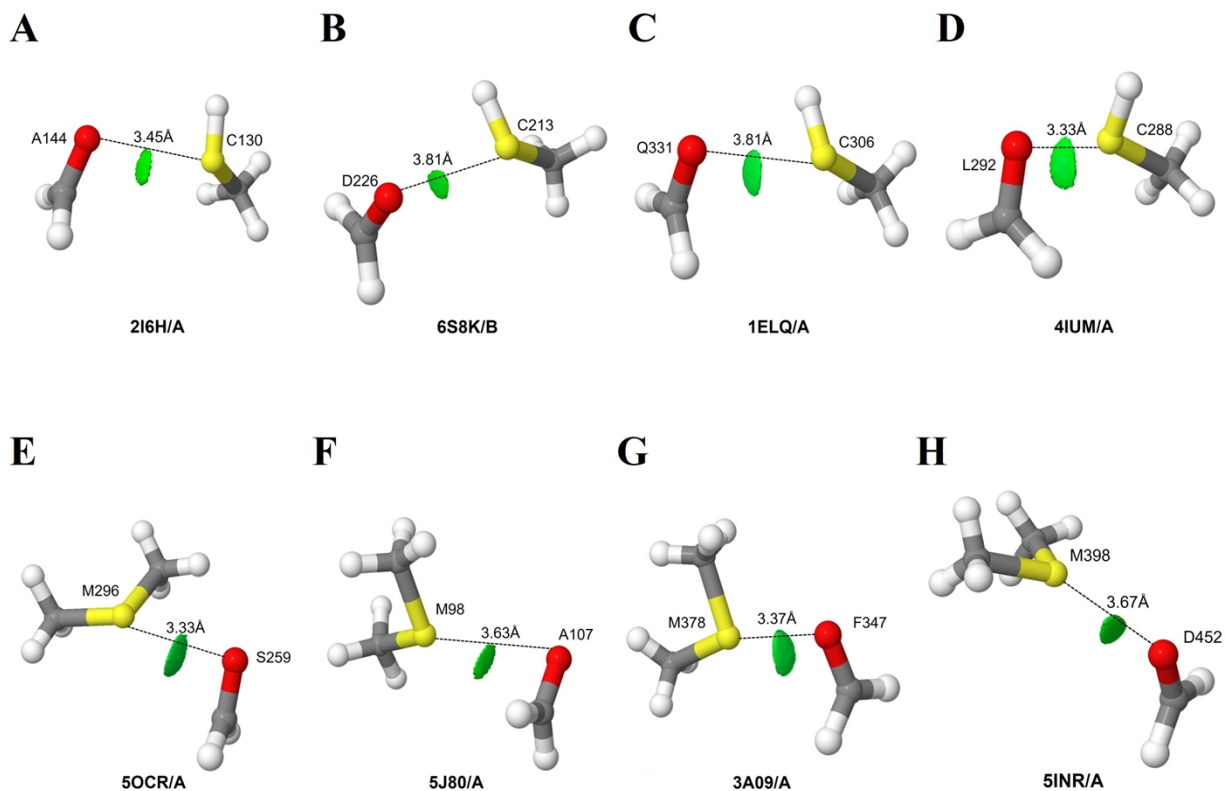

**Fig. S2:** NCIPLLOT isosurfaces of representative examples for the model systems with S...O=C contacts. All the examples show weak interactions due to the formation of chalcogen bond interactions. Four-letter unique PDB IDs/Chain IDs are given. Molecules representing the model systems are shown in ball-and-stick representation with standard colors. Cys and Met residues participating in chalcogen bond interactions with  $d(\text{S}\dots\text{O})$  distances are indicated.

**Figure S3:**

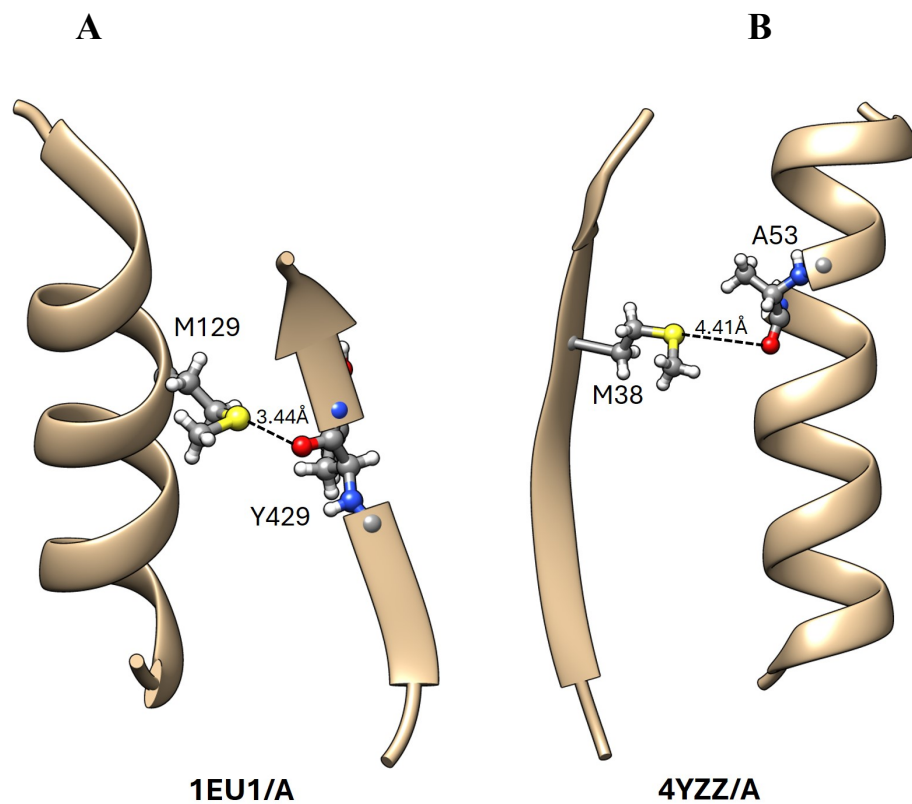

**Fig. S3:** Representative examples of chalcogen bonds stabilizing two secondary structural elements namely (A) helix-strand and (B) strand-helix. Residues participating in chalcogen bond interaction are shown in ball-and-stick representation with standard atom colors. For each example, the PDB IDs/Chain IDs and  $d(\text{S}\dots\text{O})$  distances are provided.

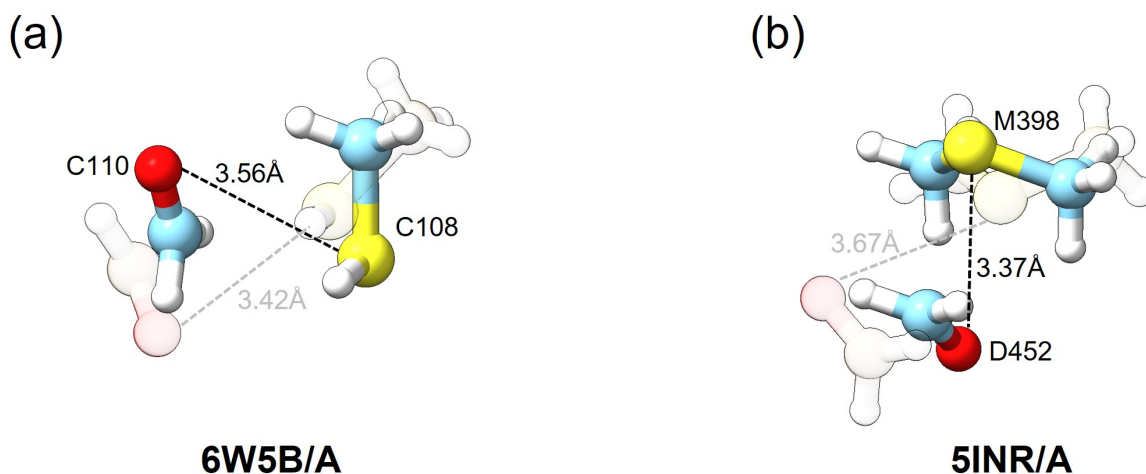

**Fig. S4:** Two representative examples of model systems with S...O=C contacts from (A) Cys and (b) Met before and after full optimization. The model systems with conformations as found in the protein structures are shown as ghost images. The structures after full optimization are superposed on the structures before optimization. It is clear that the model compounds after full optimization significantly deviated from the initial structures. The atoms for the fully optimized structures are shown in standard colors. The PDB IDs/Chain IDs and the  $d(\text{S}\dots\text{O})$  distances are displayed for each example. The  $\theta(\text{C-S}\dots\text{O})$  angle deviated from the initial  $161^\circ$  before optimization to  $\sim 67^\circ$  (Cys) and  $\sim 73^\circ$  (Met) after optimization. Full optimization also improved the interaction energies from  $-1.19$  to  $4.32$  kcal/mol for Cys and from  $-1.27$  to  $-6.01$  kcal/mol for Met.

**Table S1:** Examples of chalcogen bonds identified from high-resolution crystal structures formed by Cys residues that are used for quantum chemical calculations

| S.No. | PDB ID/<br>Chain ID | Cys<br>residue<br>number | Acceptor<br>(O=C)<br>residue<br>number | $d(\text{S}\dots\text{O})$<br>(Å) | $\theta(\text{S}\dots\text{O}=\text{C})$<br>(°) |
|-------|---------------------|--------------------------|----------------------------------------|-----------------------------------|-------------------------------------------------|
| 1     | 1C0P/A              | 1259                     | 1235                                   | 3.46                              | 160.04                                          |
| 2     | 1D2N/A              | 590                      | 629                                    | 3.43                              | 157.89                                          |
| 3     | 1ELQ/A              | 306                      | 331                                    | 3.82                              | 152.83                                          |
| 4     | 1ELQ/A              | 367                      | 169                                    | 3.99                              | 163.39                                          |
| 5     | 1ERZ/A              | 278                      | 189                                    | 3.75                              | 152.97                                          |
| 6     | 1F9V/A              | 655                      | 674                                    | 3.44                              | 159.81                                          |
| 7     | 1GXM/A              | 510                      | 528                                    | 4.02                              | 157.61                                          |
| 8     | 1H0H/A              | 136                      | 128                                    | 3.64                              | 150.41                                          |
| 9     | 1JID/A              | 53                       | 104                                    | 4.87                              | 153.55                                          |
| 10    | 1LJ8/A              | 375                      | 307                                    | 3.49                              | 153.35                                          |
| 11    | 1LQT/A              | 395                      | 386                                    | 4.16                              | 164.42                                          |
| 12    | 1NS5/A              | 112                      | 57                                     | 3.80                              | 154.72                                          |
| 13    | 1OAI/A              | 588                      | 599                                    | 3.71                              | 159.57                                          |
| 14    | 1Q6Z/A              | 240                      | 242                                    | 3.14                              | 152.53                                          |
| 15    | 1QD1/A              | 33                       | 57                                     | 3.19                              | 163.01                                          |
| 16    | 1TBF/A              | 839                      | 628                                    | 4.44                              | 156.79                                          |
| 17    | 1UXO/A              | 74                       | 69                                     | 3.54                              | 153.81                                          |
| 18    | 1VPR/A              | 980                      | 1137                                   | 3.43                              | 160.67                                          |
| 19    | 1WKQ/A              | 80                       | 103                                    | 3.43                              | 159.83                                          |
| 20    | 1XFK/A              | 198                      | 159                                    | 3.54                              | 150.36                                          |
| 21    | 1YT3/A              | 183                      | 102                                    | 4.20                              | 158.74                                          |
| 22    | 2BF6/A              | 540                      | 496                                    | 3.88                              | 156.36                                          |
| 23    | 2BII/A              | 385                      | 134                                    | 3.06                              | 163.20                                          |
| 24    | 2BMO/A              | 149                      | 35                                     | 3.14                              | 155.37                                          |
| 25    | 2C5A/A              | 85                       | 79                                     | 3.06                              | 163.94                                          |
| 26    | 2CB9/A              | 146                      | 57                                     | 3.64                              | 150.49                                          |
| 27    | 2GF3/A              | 152                      | 83                                     | 4.34                              | 153.82                                          |
| 28    | 2I6H/A              | 130                      | 144                                    | 3.45                              | 151.56                                          |
| 29    | 2II2/A              | 219                      | 202                                    | 4.05                              | 160.11                                          |
| 30    | 2IMR/A              | 318                      | 293                                    | 3.97                              | 155.85                                          |
| 31    | 2IU5/A              | 147                      | 104                                    | 4.33                              | 154.22                                          |
| 32    | 2IZR/A              | 108                      | 36                                     | 4.82                              | 165.97                                          |
| 33    | 2J91/A              | 27                       | 17                                     | 4.25                              | 165.44                                          |

|    |        |      |      |      |        |
|----|--------|------|------|------|--------|
| 34 | 2JE8/A | 639  | 641  | 3.48 | 156.99 |
| 35 | 2JE8/A | 737  | 739  | 3.50 | 154.59 |
| 36 | 2JIS/A | 44   | 445  | 4.95 | 162.01 |
| 37 | 2OLM/A | 89   | 44   | 3.20 | 156.82 |
| 38 | 2P6W/A | 177  | 182  | 3.75 | 164.67 |
| 39 | 2PS1/A | 85   | 99   | 3.66 | 159.07 |
| 40 | 2QQ5/A | 235  | 255  | 3.46 | 150.16 |
| 41 | 2R7G/A | 706  | 752  | 4.29 | 159.79 |
| 42 | 2VFO/A | 613  | 615  | 3.77 | 152.46 |
| 43 | 2WAW/A | 129  | 113  | 4.49 | 154.64 |
| 44 | 2WK1/A | 101  | 92   | 4.69 | 166.95 |
| 45 | 2WLV/A | 140  | 64   | 3.56 | 160.93 |
| 46 | 2X5N/A | 166  | 137  | 4.84 | 159.13 |
| 47 | 2XDW/A | 526  | 518  | 3.36 | 161.74 |
| 48 | 2XE4/A | 243  | 245  | 3.35 | 153.67 |
| 49 | 2Y3S/A | 261  | 255  | 3.47 | 155.50 |
| 50 | 3A15/A | 258  | 260  | 3.27 | 151.99 |
| 51 | 3ALJ/A | 255  | 186  | 3.48 | 157.71 |
| 52 | 3BD1/A | 42   | 37   | 4.72 | 152.21 |
| 53 | 3BFM/A | 103  | 129  | 4.10 | 151.55 |
| 54 | 3BFM/A | 166  | 70   | 3.92 | 150.24 |
| 55 | 3BOX/A | 139  | 84   | 3.15 | 158.90 |
| 56 | 3BOX/A | 306  | 308  | 3.63 | 155.27 |
| 57 | 3DB2/A | 34   | 42   | 3.84 | 157.58 |
| 58 | 3EIN/A | 201  | 162  | 4.98 | 158.57 |
| 59 | 3FF1/A | 399  | 283  | 4.99 | 150.36 |
| 60 | 3FGV/A | 47   | 49   | 3.30 | 155.46 |
| 61 | 3FPC/A | 203  | 344  | 4.37 | 165.39 |
| 62 | 3G0T/A | 183  | 128  | 4.16 | 166.20 |
| 63 | 3GD0/A | 326  | 310  | 3.82 | 169.24 |
| 64 | 3GE3/A | 492  | 350  | 4.19 | 150.72 |
| 65 | 3GKE/A | 81   | 83   | 3.61 | 151.47 |
| 66 | 3HKW/A | 521  | 457  | 3.75 | 154.39 |
| 67 | 3HN0/A | 99   | 101  | 3.10 | 155.13 |
| 68 | 3ILS/A | 1919 | 1946 | 4.08 | 156.77 |
| 69 | 3K1U/A | 221  | 187  | 3.48 | 153.76 |
| 70 | 3K40/A | 389  | 396  | 4.66 | 153.53 |
| 71 | 3KYA/A | 271  | 273  | 3.42 | 155.88 |
| 72 | 3LXZ/A | 107  | 121  | 4.70 | 159.93 |
| 73 | 3M0M/A | 164  | 102  | 4.77 | 156.43 |

|     |        |     |     |      |        |
|-----|--------|-----|-----|------|--------|
| 74  | 3M0M/A | 85  | 55  | 4.71 | 160.13 |
| 75  | 3MCX/A | 195 | 174 | 3.35 | 170.33 |
| 76  | 3MFI/A | 146 | 160 | 3.24 | 156.67 |
| 77  | 3MQD/A | 46  | 48  | 3.54 | 156.42 |
| 78  | 3MVU/A | 95  | 46  | 4.10 | 157.48 |
| 79  | 3MZ0/A | 231 | 234 | 3.10 | 164.67 |
| 80  | 3NEH/A | 201 | 229 | 3.32 | 152.21 |
| 81  | 3NKE/A | 251 | 228 | 4.77 | 159.41 |
| 82  | 3NO2/A | 113 | 145 | 3.11 | 163.93 |
| 83  | 3NOH/A | 111 | 121 | 3.12 | 155.79 |
| 84  | 3OA5/A | 424 | 54  | 3.87 | 153.83 |
| 85  | 3OF5/A | 198 | 200 | 3.24 | 150.28 |
| 86  | 3OIS/A | 241 | 243 | 3.77 | 153.60 |
| 87  | 3OOS/A | 227 | 234 | 3.95 | 154.49 |
| 88  | 3PMO/A | 268 | 283 | 3.15 | 169.87 |
| 89  | 3PT1/A | 465 | 410 | 3.98 | 158.66 |
| 90  | 3QH6/A | 114 | 116 | 3.27 | 150.13 |
| 91  | 3QP4/A | 173 | 11  | 3.28 | 164.23 |
| 92  | 3QSJ/A | 111 | 82  | 3.22 | 168.89 |
| 93  | 3R8Y/A | 146 | 169 | 3.01 | 157.69 |
| 94  | 3SCY/A | 126 | 180 | 3.47 | 152.10 |
| 95  | 3UR8/A | 29  | 258 | 3.36 | 153.21 |
| 96  | 3UUW/A | 126 | 238 | 3.73 | 153.26 |
| 97  | 3V4G/A | 149 | 89  | 4.81 | 156.12 |
| 98  | 3V9J/A | 95  | 73  | 3.80 | 164.59 |
| 99  | 3VBJ/A | 48  | 63  | 3.00 | 159.34 |
| 100 | 3VU9/B | 21  | 47  | 4.32 | 162.36 |
| 101 | 3VYG/B | 76  | 112 | 3.69 | 161.69 |
| 102 | 3VZX/A | 62  | 75  | 4.29 | 158.93 |
| 103 | 3WDN/A | 37  | 83  | 4.28 | 160.99 |
| 104 | 3ZEU/B | 298 | 293 | 3.55 | 153.89 |
| 105 | 3ZYL/A | 230 | 222 | 3.76 | 158.43 |
| 106 | 4A37/A | 273 | 320 | 3.44 | 150.03 |
| 107 | 4AT0/A | 457 | 238 | 3.25 | 159.01 |
| 108 | 4B4U/A | 109 | 75  | 4.10 | 153.70 |
| 109 | 4BQN/A | 26  | 224 | 3.50 | 164.34 |
| 110 | 4BWR/A | 163 | 155 | 4.14 | 153.93 |
| 111 | 4DK2/A | 134 | 131 | 4.36 | 159.25 |
| 112 | 4DZ4/A | 100 | 113 | 3.82 | 153.04 |
| 113 | 4E15/A | 6   | 8   | 3.36 | 162.52 |

|     |        |     |     |      |        |
|-----|--------|-----|-----|------|--------|
| 114 | 4EA9/A | 29  | 97  | 3.05 | 161.90 |
| 115 | 4EYZ/A | 151 | 139 | 3.41 | 154.34 |
| 116 | 4F6T/B | 173 | 76  | 4.96 | 159.87 |
| 117 | 4FS7/A | 136 | 110 | 3.12 | 162.94 |
| 118 | 4FS7/A | 181 | 156 | 3.20 | 162.43 |
| 119 | 4FS7/A | 204 | 178 | 3.02 | 168.89 |
| 120 | 4FS7/A | 295 | 269 | 3.11 | 166.30 |
| 121 | 4FS7/A | 316 | 292 | 3.14 | 162.47 |
| 122 | 4FS7/A | 339 | 313 | 3.06 | 159.45 |
| 123 | 4FS7/A | 362 | 336 | 3.00 | 164.53 |
| 124 | 4GMU/A | 407 | 169 | 4.00 | 162.46 |
| 125 | 4H5I/A | 87  | 71  | 3.10 | 160.99 |
| 126 | 4IA6/A | 89  | 531 | 4.34 | 155.23 |
| 127 | 4IUM/A | 288 | 292 | 3.33 | 164.46 |
| 128 | 4JN7/A | 92  | 21  | 3.26 | 152.25 |
| 129 | 4L4E/A | 85  | 90  | 4.27 | 151.93 |
| 130 | 4LAN/A | 159 | 161 | 3.47 | 152.70 |
| 131 | 4LDV/A | 125 | 223 | 4.64 | 161.20 |
| 132 | 4LER/A | 59  | 424 | 4.21 | 151.54 |
| 133 | 4LPQ/A | 300 | 282 | 3.37 | 157.76 |
| 134 | 4MC3/A | 139 | 131 | 3.93 | 158.36 |
| 135 | 4OJ5/A | 525 | 495 | 3.54 | 151.43 |
| 136 | 4PFO/A | 236 | 421 | 3.81 | 150.21 |
| 137 | 4Q98/A | 308 | 299 | 4.47 | 167.59 |
| 138 | 4QUS/A | 100 | 102 | 3.34 | 156.44 |
| 139 | 4R9P/A | 217 | 211 | 3.99 | 154.82 |
| 140 | 4RD8/A | 134 | 77  | 3.70 | 155.81 |
| 141 | 4S28/A | 443 | 402 | 3.80 | 159.64 |
| 142 | 4USK/A | 155 | 81  | 3.58 | 150.56 |
| 143 | 4UWX/A | 155 | 139 | 4.91 | 158.51 |
| 144 | 4V1S/A | 109 | 84  | 4.26 | 159.89 |
| 145 | 4WU0/A | 317 | 319 | 3.46 | 152.75 |
| 146 | 4XEM/A | 187 | 173 | 4.01 | 163.68 |
| 147 | 4XY5/A | 91  | 93  | 3.19 | 153.91 |
| 148 | 4Z9P/A | 53  | 76  | 3.60 | 161.86 |
| 149 | 4ZSW/A | 177 | 169 | 3.53 | 164.92 |
| 150 | 4ZSW/A | 196 | 137 | 3.30 | 160.38 |
| 151 | 4ZSW/A | 412 | 384 | 4.30 | 151.18 |
| 152 | 5AIZ/A | 56  | 15  | 3.13 | 168.08 |
| 153 | 5AJJ/A | 192 | 152 | 3.27 | 158.65 |

|     |        |     |     |      |        |
|-----|--------|-----|-----|------|--------|
| 154 | 5AN4/A | 140 | 253 | 4.29 | 152.22 |
| 155 | 5AO9/A | 134 | 195 | 4.12 | 163.77 |
| 156 | 5BP8/A | 484 | 519 | 3.86 | 154.15 |
| 157 | 5CIY/A | 35  | 37  | 3.51 | 150.56 |
| 158 | 5FSV/A | 188 | 175 | 3.15 | 156.10 |
| 159 | 5G3T/A | 387 | 401 | 4.48 | 160.86 |
| 160 | 5HT2/A | 283 | 248 | 4.04 | 151.42 |
| 161 | 5HZ2/A | 459 | 290 | 3.42 | 160.51 |
| 162 | 5I2H/A | 277 | 269 | 3.16 | 157.17 |
| 163 | 5I95/A | 235 | 171 | 4.35 | 152.51 |
| 164 | 5I95/A | 418 | 325 | 3.23 | 162.98 |
| 165 | 5IN4/A | 142 | 94  | 3.58 | 163.31 |
| 166 | 5K7F/A | 43  | 18  | 4.33 | 167.00 |
| 167 | 5KO5/A | 231 | 163 | 3.53 | 154.24 |
| 168 | 5KPG/A | 152 | 126 | 3.40 | 157.22 |
| 169 | 5KTN/A | 199 | 229 | 3.76 | 154.01 |
| 170 | 5L9A/A | 202 | 188 | 4.99 | 152.03 |
| 171 | 5NCB/A | 54  | 48  | 3.35 | 155.24 |
| 172 | 5ONN/A | 61  | 64  | 3.79 | 153.08 |
| 173 | 5QOV/A | 140 | 129 | 3.62 | 163.34 |
| 174 | 5RL9/A | 27  | 92  | 4.02 | 150.08 |
| 175 | 5RW1/A | 316 | 362 | 3.35 | 153.37 |
| 176 | 5T39/A | 224 | 220 | 3.14 | 157.58 |
| 177 | 5T3B/A | 410 | 412 | 3.39 | 153.67 |
| 178 | 5TEE/A | 371 | 373 | 3.42 | 150.29 |
| 179 | 5TQI/A | 75  | 77  | 3.06 | 157.02 |
| 180 | 5UCS/A | 90  | 102 | 3.86 | 150.99 |
| 181 | 5UKI/A | 277 | 311 | 3.88 | 154.78 |
| 182 | 5XVT/A | 121 | 162 | 3.27 | 150.30 |
| 183 | 5XWC/A | 338 | 340 | 3.35 | 153.03 |
| 184 | 5YRV/A | 330 | 297 | 4.97 | 150.41 |
| 185 | 6AON/A | 32  | 11  | 3.36 | 152.28 |
| 186 | 6AU8/A | 205 | 275 | 3.54 | 154.67 |
| 187 | 6B6U/A | 358 | 464 | 3.76 | 158.23 |
| 188 | 6B9H/A | 125 | 83  | 4.90 | 158.44 |
| 189 | 6COF/A | 213 | 205 | 3.43 | 153.56 |
| 190 | 6CR0/A | 221 | 18  | 3.79 | 168.49 |
| 191 | 6CXB/A | 646 | 648 | 3.56 | 156.57 |
| 192 | 6D4K/A | 215 | 193 | 4.00 | 158.61 |
| 193 | 6E43/A | 335 | 200 | 3.07 | 157.00 |

|     |        |      |      |      |        |
|-----|--------|------|------|------|--------|
| 194 | 6E85/A | 102  | 78   | 4.73 | 158.24 |
| 195 | 6ECT/A | 1066 | 1035 | 4.39 | 153.69 |
| 196 | 6EWH/A | 276  | 217  | 3.86 | 158.74 |
| 197 | 6F0P/A | 973  | 1056 | 3.28 | 158.24 |
| 198 | 6FJN/A | 337  | 332  | 3.28 | 163.49 |
| 199 | 6FOP/A | 555  | 610  | 4.96 | 159.52 |
| 200 | 6GDJ/A | 229  | 213  | 4.53 | 164.20 |
| 201 | 6GG7/A | 19   | 319  | 4.17 | 154.97 |
| 202 | 6GQD/A | 180  | 182  | 3.27 | 152.97 |
| 203 | 6HCW/A | 497  | 250  | 3.16 | 158.69 |
| 204 | 6HEM/A | 931  | 893  | 3.25 | 162.91 |
| 205 | 6HFO/A | 321  | 318  | 3.98 | 154.44 |
| 206 | 6HFZ/A | 287  | 234  | 4.56 | 152.59 |
| 207 | 6HQD/A | 50   | 52   | 3.38 | 162.27 |
| 208 | 6I18/A | 80   | 68   | 3.41 | 151.88 |
| 209 | 6ILU/A | 261  | 264  | 3.09 | 158.37 |
| 210 | 6J0Y/A | 452  | 459  | 4.29 | 164.22 |
| 211 | 6JH7/A | 246  | 2    | 3.27 | 162.51 |
| 212 | 6JY1/A | 293  | 45   | 4.06 | 150.32 |
| 213 | 6KJH/A | 325  | 71   | 3.44 | 156.02 |
| 214 | 6KQS/A | 355  | 296  | 3.21 | 155.55 |
| 215 | 6LR3/A | 57   | 48   | 3.86 | 154.93 |
| 216 | 6LXU/A | 333  | 384  | 4.89 | 154.73 |
| 217 | 6N2H/A | 31   | 26   | 4.78 | 152.23 |
| 218 | 6NYT/A | 744  | 746  | 3.66 | 155.03 |
| 219 | 6OAL/A | 608  | 629  | 3.81 | 169.87 |
| 220 | 6OAL/A | 943  | 947  | 3.33 | 151.57 |
| 221 | 6OK1/A | 31   | 63   | 4.83 | 165.26 |
| 222 | 6P2D/A | 47   | 8    | 4.67 | 159.03 |
| 223 | 6P2L/A | 520  | 524  | 3.32 | 165.37 |
| 224 | 6P2L/A | 633  | 635  | 3.34 | 151.94 |
| 225 | 6QSP/A | 212  | 345  | 3.40 | 159.33 |
| 226 | 6S8K/B | 213  | 226  | 3.81 | 155.68 |
| 227 | 6SBQ/A | 768  | 824  | 3.94 | 158.05 |
| 228 | 6TUO/A | 197  | 222  | 3.78 | 150.36 |
| 229 | 6U1V/A | 114  | 84   | 3.99 | 152.52 |
| 230 | 6W5B/A | 108  | 110  | 3.43 | 160.98 |
| 231 | 6WRH/A | 155  | 168  | 4.21 | 158.40 |
| 232 | 6YPF/A | 118  | 120  | 3.56 | 156.18 |
| 233 | 7LD8/A | 187  | 61   | 4.17 | 156.62 |



**Table S2:** Examples of chalcogen bonds identified from high-resolution crystal structures formed by Met residues that are used for quantum chemical calculations

| S.No. | PDB ID/<br>Chain ID | Met<br>residue<br>number | Acceptor<br>(O=C)<br>residue<br>number | $d(\text{S}\dots\text{O})$<br>(Å) | $\theta(\text{S}\dots\text{O}=\text{C})$<br>(°) |
|-------|---------------------|--------------------------|----------------------------------------|-----------------------------------|-------------------------------------------------|
| 1     | 1D2N/A              | 581                      | 589                                    | 4.39                              | 150.03                                          |
| 2     | 1EU1/A              | 129                      | 429                                    | 3.44                              | 157.11                                          |
| 3     | 1EVL/A              | 374                      | 520                                    | 3.70                              | 151.34                                          |
| 4     | 1EVL/A              | 509                      | 334                                    | 4.91                              | 158.76                                          |
| 5     | 1EVL/A              | 593                      | 582                                    | 3.80                              | 158.04                                          |
| 6     | 1FTR/A              | 20                       | 250                                    | 3.25                              | 156.43                                          |
| 7     | 1J7K/A              | 207                      | 240                                    | 3.91                              | 152.30                                          |
| 8     | 1JG8/A              | 285                      | 143                                    | 4.12                              | 152.36                                          |
| 9     | 1JL0/A              | 233                      | 60                                     | 3.66                              | 159.34                                          |
| 10    | 1KDK/A              | 107                      | 129                                    | 4.49                              | 153.18                                          |
| 11    | 1LC5/A              | 239                      | 91                                     | 3.41                              | 155.07                                          |
| 12    | 1M7Y/A              | 299                      | 126                                    | 3.91                              | 152.79                                          |
| 13    | 1MC2/A              | 1095                     | 1071                                   | 3.77                              | 158.21                                          |
| 14    | 1MJ5/A              | 253                      | 133                                    | 3.02                              | 163.66                                          |
| 15    | 1TBF/A              | 760                      | 646                                    | 4.27                              | 150.49                                          |
| 16    | 1UWK/A              | 396                      | 188                                    | 4.09                              | 157.07                                          |
| 17    | 1V6T/A              | 76                       | 66                                     | 3.92                              | 154.01                                          |
| 18    | 1VYI/A              | 232                      | 266                                    | 4.74                              | 153.76                                          |
| 19    | 1X0T/A              | 104                      | 67                                     | 3.75                              | 151.99                                          |
| 20    | 1XFI/A              | 7                        | 289                                    | 4.92                              | 154.22                                          |
| 21    | 2BII/A              | 283                      | 278                                    | 3.78                              | 151.88                                          |
| 22    | 2D1G/A              | 335                      | 375                                    | 4.74                              | 156.30                                          |
| 23    | 2E7Z/A              | 505                      | 91                                     | 3.85                              | 157.51                                          |
| 24    | 2EAB/A              | 436                      | 379                                    | 3.54                              | 155.72                                          |
| 25    | 2GSO/A              | 113                      | 107                                    | 3.29                              | 161.22                                          |
| 26    | 2NX4/A              | 162                      | 185                                    | 4.67                              | 153.74                                          |
| 27    | 2OVJ/A              | 458                      | 442                                    | 4.05                              | 154.80                                          |
| 28    | 2OVJ/A              | 477                      | 528                                    | 4.86                              | 153.44                                          |
| 29    | 2P6W/A              | 194                      | 202                                    | 4.01                              | 157.33                                          |
| 30    | 2Q35/A              | 111                      | 120                                    | 4.58                              | 152.06                                          |
| 31    | 2QKP/A              | 364                      | 368                                    | 3.96                              | 156.01                                          |
| 32    | 2RDQ/A              | 224                      | 169                                    | 3.10                              | 164.90                                          |
| 33    | 2RKV/A              | 343                      | 312                                    | 4.76                              | 150.99                                          |

|    |        |      |      |      |        |
|----|--------|------|------|------|--------|
| 34 | 2WAO/A | 182  | 229  | 3.44 | 157.88 |
| 35 | 2WFP/A | 119  | 126  | 4.40 | 157.91 |
| 36 | 2ZB4/A | 158  | 171  | 3.83 | 164.30 |
| 37 | 2ZQ0/A | 280  | 250  | 4.25 | 166.25 |
| 38 | 3A09/A | 378  | 347  | 3.38 | 156.45 |
| 39 | 3AML/A | 225  | 272  | 4.41 | 162.22 |
| 40 | 3B0X/A | 1    | 40   | 4.90 | 150.51 |
| 41 | 3BMX/A | 560  | 596  | 4.17 | 160.69 |
| 42 | 3BOX/A | 299  | 288  | 3.64 | 153.85 |
| 43 | 3BOX/A | 352  | 359  | 3.66 | 160.46 |
| 44 | 3BVX/A | 1026 | 1006 | 3.33 | 155.46 |
| 45 | 3C7X/A | 422  | 470  | 4.54 | 155.75 |
| 46 | 3CTP/A | 66   | 105  | 4.18 | 156.74 |
| 47 | 3DO8/A | 1    | 3    | 3.90 | 150.66 |
| 48 | 3FEG/A | 122  | 265  | 3.84 | 154.43 |
| 49 | 3GZD/A | 194  | 143  | 3.24 | 162.55 |
| 50 | 3H8G/A | 393  | 444  | 3.64 | 156.28 |
| 51 | 3H9C/A | 333  | 341  | 4.58 | 151.67 |
| 52 | 3I2K/A | 16   | 93   | 3.63 | 161.27 |
| 53 | 3IT3/A | 312  | 307  | 3.37 | 153.95 |
| 54 | 3MDM/A | 316  | 469  | 4.48 | 157.13 |
| 55 | 3MFI/A | 395  | 423  | 4.03 | 165.24 |
| 56 | 3NZN/A | 26   | 35   | 3.43 | 161.41 |
| 57 | 3OND/A | 396  | 247  | 4.34 | 157.04 |
| 58 | 3PV8/A | 701  | 696  | 3.41 | 150.68 |
| 59 | 3R3Q/A | 143  | 138  | 3.84 | 160.70 |
| 60 | 3S5M/A | 734  | 1114 | 3.56 | 157.54 |
| 61 | 3S5M/A | 819  | 829  | 3.72 | 161.65 |
| 62 | 3UW3/A | 257  | 263  | 3.87 | 151.89 |
| 63 | 3ZSU/A | 78   | 115  | 3.81 | 152.35 |
| 64 | 3ZXK/A | 555  | 399  | 4.16 | 150.91 |
| 65 | 4AK2/A | 611  | 655  | 3.43 | 155.12 |
| 66 | 4ATE/A | 262  | 232  | 3.99 | 154.67 |
| 67 | 4AZ6/A | 305  | 333  | 3.47 | 159.91 |
| 68 | 4C08/A | 160  | 157  | 4.74 | 152.32 |
| 69 | 4CHI/A | 308  | 241  | 3.89 | 157.24 |
| 70 | 4CJ0/A | 281  | 519  | 3.73 | 156.70 |
| 71 | 4DNX/A | 1    | 184  | 3.69 | 152.78 |
| 72 | 4DNX/A | 344  | 329  | 4.37 | 157.61 |
| 73 | 4EAD/A | 242  | 90   | 3.58 | 152.07 |

|     |        |     |     |      |        |
|-----|--------|-----|-----|------|--------|
| 74  | 4FZL/A | 39  | 105 | 4.12 | 150.37 |
| 75  | 4G38/A | 432 | 394 | 4.06 | 165.13 |
| 76  | 4GF0/A | 136 | 105 | 3.49 | 156.66 |
| 77  | 4HHR/A | 152 | 391 | 4.05 | 159.48 |
| 78  | 4I71/A | 54  | 66  | 3.31 | 156.35 |
| 79  | 4LCL/A | 85  | 207 | 4.36 | 158.10 |
| 80  | 4LDV/A | 64  | 240 | 4.11 | 151.47 |
| 81  | 4LHD/A | 154 | 972 | 3.86 | 152.42 |
| 82  | 4MAI/A | 3   | 15  | 3.64 | 160.84 |
| 83  | 4MBO/A | 553 | 499 | 3.46 | 156.88 |
| 84  | 4MLO/A | 229 | 263 | 4.35 | 154.05 |
| 85  | 4ORD/A | 87  | 62  | 3.78 | 156.63 |
| 86  | 4PWQ/A | 170 | 146 | 4.79 | 150.64 |
| 87  | 4QGS/A | 276 | 352 | 4.32 | 158.60 |
| 88  | 4R6H/A | 62  | 80  | 3.80 | 152.28 |
| 89  | 4TJV/A | 128 | 151 | 4.17 | 161.92 |
| 90  | 4UP3/A | 72  | 14  | 4.46 | 151.28 |
| 91  | 4USA/A | 366 | 833 | 4.39 | 150.44 |
| 92  | 4WBY/A | 280 | 193 | 3.94 | 151.59 |
| 93  | 4WS6/A | 217 | 183 | 3.46 | 154.26 |
| 94  | 4WVA/A | 386 | 411 | 3.22 | 160.89 |
| 95  | 4XHF/A | 203 | 215 | 4.12 | 151.78 |
| 96  | 4YAA/A | 444 | 406 | 3.25 | 162.17 |
| 97  | 4YZZ/A | 38  | 53  | 4.41 | 151.26 |
| 98  | 5BOI/A | 346 | 301 | 3.90 | 162.58 |
| 99  | 5BXR/A | 317 | 356 | 4.24 | 151.52 |
| 100 | 5C8Z/A | 241 | 157 | 3.40 | 151.13 |
| 101 | 5CR5/A | 78  | 93  | 4.44 | 153.20 |
| 102 | 5D16/A | 524 | 391 | 4.49 | 150.27 |
| 103 | 5DCU/A | 356 | 273 | 3.34 | 153.65 |
| 104 | 5DKX/A | 910 | 841 | 4.24 | 158.43 |
| 105 | 5EB1/A | 86  | 49  | 3.88 | 152.58 |
| 106 | 5EKY/A | 192 | 155 | 4.91 | 154.06 |
| 107 | 5EU0/B | 62  | 41  | 4.62 | 154.72 |
| 108 | 5EYN/A | 162 | 134 | 4.32 | 152.52 |
| 109 | 5FQE/A | 343 | 351 | 4.01 | 153.80 |
| 110 | 5HWN/A | 192 | 168 | 3.54 | 150.37 |
| 111 | 5HZD/A | 616 | 611 | 3.77 | 163.69 |
| 112 | 5I7I/A | 178 | 234 | 3.83 | 153.90 |
| 113 | 5INR/A | 398 | 452 | 3.67 | 161.30 |

|     |        |     |     |      |        |
|-----|--------|-----|-----|------|--------|
| 114 | 5INR/A | 407 | 351 | 3.50 | 159.68 |
| 115 | 5IY2/A | 256 | 251 | 3.94 | 152.63 |
| 116 | 5J80/A | 98  | 107 | 3.64 | 158.40 |
| 117 | 5J90/A | 348 | 220 | 4.82 | 152.12 |
| 118 | 5JOV/A | 915 | 910 | 3.94 | 161.74 |
| 119 | 5K3X/A | 314 | 237 | 3.69 | 154.98 |
| 120 | 5LJW/A | 146 | 16  | 4.29 | 157.48 |
| 121 | 5LTE/A | 68  | 150 | 4.04 | 158.96 |
| 122 | 5LX8/A | 492 | 434 | 4.79 | 154.12 |
| 123 | 5MC1/A | 217 | 212 | 3.48 | 155.01 |
| 124 | 5OCR/A | 296 | 259 | 3.34 | 155.80 |
| 125 | 5OL4/C | 106 | 100 | 4.20 | 152.80 |
| 126 | 5TNV/A | 123 | 173 | 4.82 | 156.03 |
| 127 | 5USB/A | 118 | 107 | 4.35 | 158.17 |
| 128 | 5VIA/A | 120 | 135 | 4.67 | 156.05 |
| 129 | 5WMK/A | 364 | 307 | 3.14 | 150.19 |
| 130 | 5X8Z/A | 41  | 107 | 3.74 | 162.78 |
| 131 | 5YQJ/A | 787 | 799 | 4.00 | 150.95 |
| 132 | 5YSE/A | 350 | 334 | 4.43 | 153.20 |
| 133 | 5YSE/A | 364 | 340 | 4.72 | 153.30 |
| 134 | 6A2Q/A | 161 | 209 | 4.01 | 150.94 |
| 135 | 6AD3/A | 346 | 195 | 3.86 | 155.85 |
| 136 | 6DUB/A | 274 | 100 | 3.78 | 166.73 |
| 137 | 6EE7/A | 67  | 61  | 3.72 | 151.04 |
| 138 | 6F6M/A | 143 | 158 | 3.71 | 151.27 |
| 139 | 6F8A/A | 165 | 63  | 3.42 | 153.94 |
| 140 | 6HCW/A | 54  | 147 | 3.66 | 153.76 |
| 141 | 6I8L/B | 231 | 82  | 4.03 | 152.90 |
| 142 | 6I9W/A | 27  | 239 | 4.45 | 151.13 |
| 143 | 6J4P/A | 118 | 161 | 3.51 | 171.98 |
| 144 | 6JCH/A | 360 | 355 | 3.90 | 151.08 |
| 145 | 6JZ2/A | 447 | 434 | 4.06 | 150.55 |
| 146 | 6KO8/A | 126 | 60  | 4.31 | 155.91 |
| 147 | 6KRI/A | 537 | 405 | 4.46 | 150.94 |
| 148 | 6NOK/A | 52  | 267 | 4.54 | 153.50 |
| 149 | 6OJL/A | 543 | 566 | 4.15 | 157.95 |
| 150 | 6OMP/A | 298 | 245 | 4.60 | 153.27 |
| 151 | 6Q10/A | 81  | 147 | 3.92 | 152.70 |
| 152 | 6R09/A | 174 | 171 | 3.18 | 166.55 |
| 153 | 6RS4/A | 303 | 300 | 3.31 | 151.07 |

|     |        |     |     |      |        |
|-----|--------|-----|-----|------|--------|
| 154 | 6RY0/A | 89  | 107 | 4.74 | 153.89 |
| 155 | 6SUK/A | 248 | 272 | 3.61 | 151.79 |
| 156 | 6TGU/A | 138 | 219 | 4.32 | 151.90 |
| 157 | 6V4B/A | 68  | 78  | 3.47 | 155.26 |
| 158 | 6WGM/A | 323 | 115 | 3.24 | 161.06 |
| 159 | 6ZTU/A | 168 | 163 | 3.28 | 158.54 |
| 160 | 7C3H/A | 267 | 462 | 3.37 | 162.62 |
| 161 | 7DIF/A | 29  | 77  | 3.22 | 156.50 |
| 162 | 7K7W/A | 88  | 154 | 3.63 | 156.45 |
